# Supplementary material
Source: PubMed Central journal article supplement (PMC9898186)
Supplement: NIHMS1860324-supplement-321586_Major_Resources_Table.pdf [file NIHMS1860324-supplement-321586_Major_Resources_Table.pdf]

## Major Resources Table

In order to allow validation and replication of experiments, all essential research materials listed in the Methods should be included in the Major Resources Table below. Authors are encouraged to use public repositories for protocols, data, code, and other materials and provide persistent identifiers and/or links to repositories when available. Authors may add or delete rows as needed.

### Animals (in vivo studies)

| Species | Vendor or Source | Background Strain | Sex | Persistent ID / URL |
|---------|------------------|-------------------|-----|---------------------|
|         |                  |                   |     |                     |
|         |                  |                   |     |                     |
|         |                  |                   |     |                     |

### Genetically Modified Animals

|                 | Species | Vendor or Source | Background Strain | Other Information | Persistent ID / URL |
|-----------------|---------|------------------|-------------------|-------------------|---------------------|
| Parent - Male   |         |                  |                   |                   |                     |
| Parent - Female |         |                  |                   |                   |                     |

### Antibodies

| Target antigen | Vendor or Source | Catalog # | Working concentration | Lot # (preferred but not required) | Persistent ID / URL |
|----------------|------------------|-----------|-----------------------|------------------------------------|---------------------|
|                |                  |           |                       |                                    |                     |
|                |                  |           |                       |                                    |                     |

### DNA/cDNA Clones

| Clone Name    | Sequence | Source / Repository | Persistent ID / URL                                                     |
|---------------|----------|---------------------|-------------------------------------------------------------------------|
| SNHG18-SiRNA  | 4390846  | ThermoFisher        | <a href="https://www.thermofisher.com">https://www.thermofisher.com</a> |
| Control-SiRNA | s452763  | ThermoFisher        | <a href="https://www.thermofisher.com">https://www.thermofisher.com</a> |
|               |          |                     |                                                                         |

### Cultured Cells

| Name                              | Vendor or Source                               | Sex (F, M, or unknown) | Persistent ID / URL                                                 |
|-----------------------------------|------------------------------------------------|------------------------|---------------------------------------------------------------------|
| Human primary aortic SMCs         | Lonza                                          | 2 F and 7 M            | <a href="https://www.lonza.com/">https://www.lonza.com/</a>         |
| Human primary aortic SMCs         | PromoCell                                      | 1 F and 2 M            | <a href="https://www.promocell.com/">https://www.promocell.com/</a> |
| Human primary aortic SMCs         | University of California at Los Angeles (UCLA) | 30 F and 109 M         | PMID: 20170901, 33040646                                            |
| Immortalized coronary artery SMCs | University of Virginia                         | Unknown                |                                                                     |

### Data & Code Availability

| Description  | Source / Repository    | Persistent ID / URL                                                                                                                   |
|--------------|------------------------|---------------------------------------------------------------------------------------------------------------------------------------|
| RNAseq data  | GEO                    | GSE193817                                                                                                                             |
| ATACseq data | GEO                    | GSE198544                                                                                                                             |
| eQTL data    | University of Virginia | <a href="https://virginia.box.com/s/t5e1tzlaqs85z13o4ie2f9t1i0zfypd">https://virginia.box.com/s/t5e1tzlaqs85z13o4ie2f9t1i0zfypd</a>   |
| sQTL data    | University of Virginia | <a href="https://virginia.box.com/s/o81cxrj5xne3xem4au785mupikduuwbu">https://virginia.box.com/s/o81cxrj5xne3xem4au785mupikduuwbu</a> |

DOI [to be added]

|                                                                     |                        |                                                                                       |
|---------------------------------------------------------------------|------------------------|---------------------------------------------------------------------------------------|
| User-friendly website to query the dataset published in this paper. | University of Virginia | <a href="http://civeleklab.cphg.virginia.edu">http://civeleklab.cphg.virginia.edu</a> |
|---------------------------------------------------------------------|------------------------|---------------------------------------------------------------------------------------|

**Other**

| Description | Source / Repository | Persistent ID / URL |
|-------------|---------------------|---------------------|
|             |                     |                     |
|             |                     |                     |
|             |                     |                     |

## ARRIVE GUIDELINES

The ARRIVE guidelines (<https://arriveguidelines.org/>) are a checklist of recommendations to improve the reporting of research involving animals. Key elements of the study design should be included below to better enable readers to scrutinize the research adequately, evaluate its methodological rigor, and reproduce the methods or findings.

### Study Design

| Groups             | Sex | Age | Number (prior to experiment) | Number (after termination) | Littermates (Yes/No) | Other description |
|--------------------|-----|-----|------------------------------|----------------------------|----------------------|-------------------|
| Group 1 (Control)  |     |     |                              |                            |                      |                   |
| Group 2            |     |     |                              |                            |                      |                   |
| Add more if needed |     |     |                              |                            |                      |                   |

**Sample Size:** Please explain how the sample size was decided Please provide details of any a *prior* sample size calculation, if done.

### Inclusion Criteria

### Exclusion Criteria

### Randomization

### Blinding
